# Supplementary material for: Physical Activity Attenuates the Influence of FTO Variants on Obesity Risk: A Meta-Analysis of 218,166 Adults and 19,268 Children
Source: PLoS Med. 2011 Nov 1;8(11):e1001116. doi: 10.1371/journal.pmed.1001116 (PMC3206047; doi:10.1371/journal.pmed.1001116)
Supplement: Figure S5 — Forest plot of the effect of the interaction between the FTO rs9939609 SNP and physical activity on body fat percentage in a random effects meta-analysis of 61,509 adults. (PDF) [file pmed.1001116.s005.pdf]

# Study

# Interaction beta (95% CI), %

## North America (n=892)

|                                                      |                            |
|------------------------------------------------------|----------------------------|
| QFS                                                  | -1.43 (-4.20, 1.33)        |
| HAPI                                                 | -1.67 (-3.97, 0.64)        |
| <b>P for interaction = 0.082, I<sup>2</sup> = 0%</b> | <b>-1.57 (-3.34, 0.20)</b> |

## Europe (n=60,617)

|                                                      |                             |
|------------------------------------------------------|-----------------------------|
| ORGGEN cases                                         | -0.15 (-1.70, 1.41)         |
| RISC                                                 | 1.47 (-0.16, 3.10)          |
| MRC Ely                                              | -0.97 (-2.20, 0.26)         |
| ORGGEN controls                                      | -1.15 (-3.11, 0.82)         |
| TUEF & TULIP                                         | -0.63 (-2.56, 1.29)         |
| GOOD                                                 | 0.63 (-0.79, 2.05)          |
| ERF                                                  | 1.11 (-1.56, 3.78)          |
| YFS                                                  | 0.14 (-2.12, 2.40)          |
| AGES-Reykjavik                                       | -0.23 (-0.84, 0.38)         |
| TwinsUK                                              | -0.19 (-0.92, 0.53)         |
| EPIC-Potsdam                                         | -0.29 (-0.91, 0.33)         |
| METSIM                                               | 0.11 (-0.51, 0.73)          |
| CoLaus                                               | -0.04 (-0.80, 0.71)         |
| MONICA/KORA                                          | -0.03 (-0.55, 0.49)         |
| MDC                                                  | -0.25 (-0.46, -0.04)        |
| <b>P for interaction = 0.023, I<sup>2</sup> = 0%</b> | <b>-0.18 (-0.34, -0.03)</b> |
| <b>P for interaction = 0.016, I<sup>2</sup> = 0%</b> | <b>-0.19 (-0.35, -0.04)</b> |

-4 -3 -2 -1 0 1 2 3 4
