# Supplementary material for: Physical Activity Attenuates the Influence of FTO Variants on Obesity Risk: A Meta-Analysis of 218,166 Adults and 19,268 Children
Source: PubMed Central journal article supplement (PMC3206047; doi:10.1371/journal.pmed.1001116), 2011-11-01
Supplement: pmed.1001116.s003.pdf [file pmed.1001116.s003.pdf]

**Study**

**Interaction-OR (95% CI)**

**North America (n=44,574)**

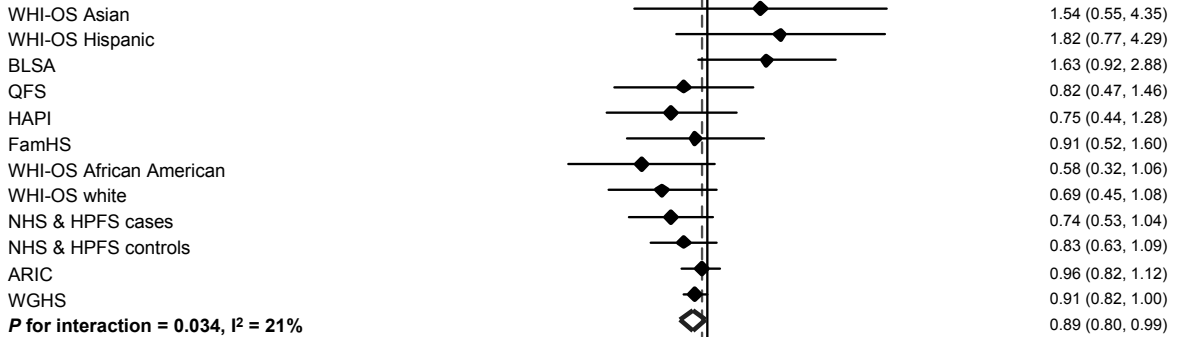

**Europe (n=163,069)**

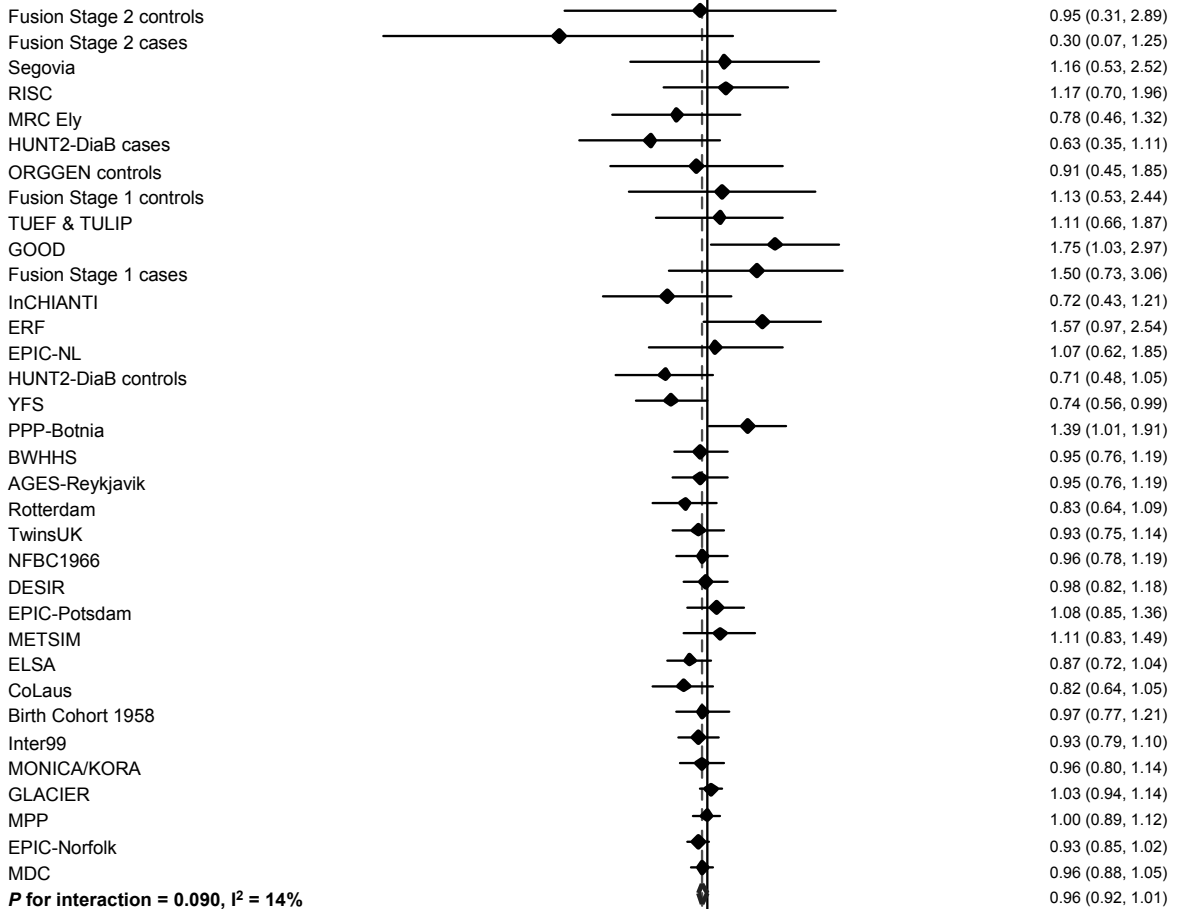

**Asia (n=5,921)**

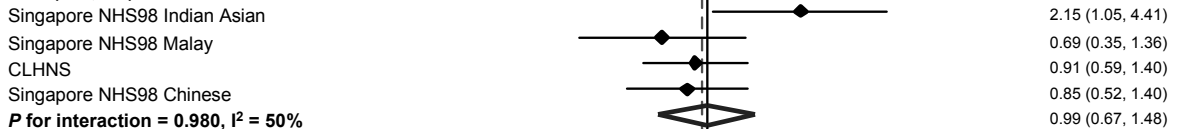

**P for interaction = 0.015, I² = 20%**

**0.95 (0.91, 0.99)**

0.063 0.125 0.25 0.5 1 2 4 8 16
