# Supplementary material for: Physical Activity Attenuates the Influence of FTO Variants on Obesity Risk: A Meta-Analysis of 218,166 Adults and 19,268 Children
Source: PubMed Central journal article supplement (PMC3206047; doi:10.1371/journal.pmed.1001116), 2011-11-01
Supplement: pmed.1001116.s004.pdf [file pmed.1001116.s004.pdf]

**Study**

**Interaction beta (95% CI), cm**

**North America (25,117)**

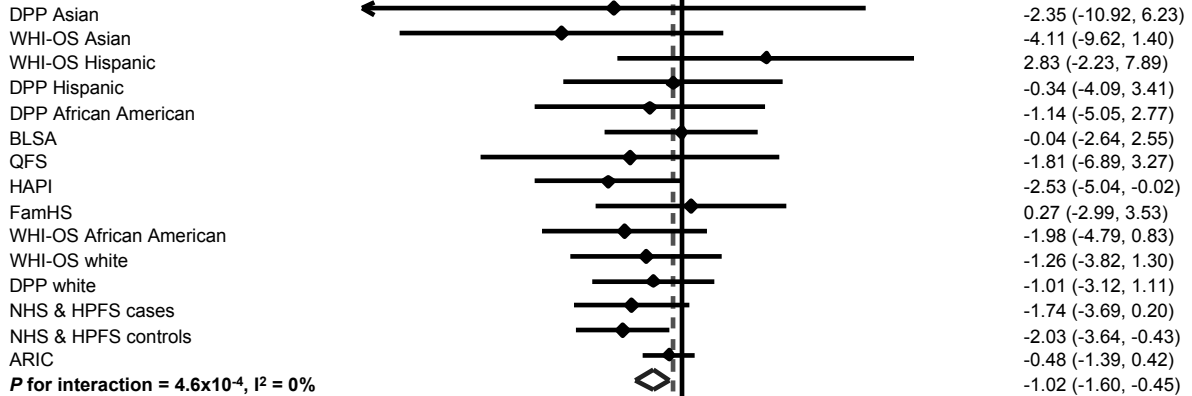

**Europe (n=128,811)**

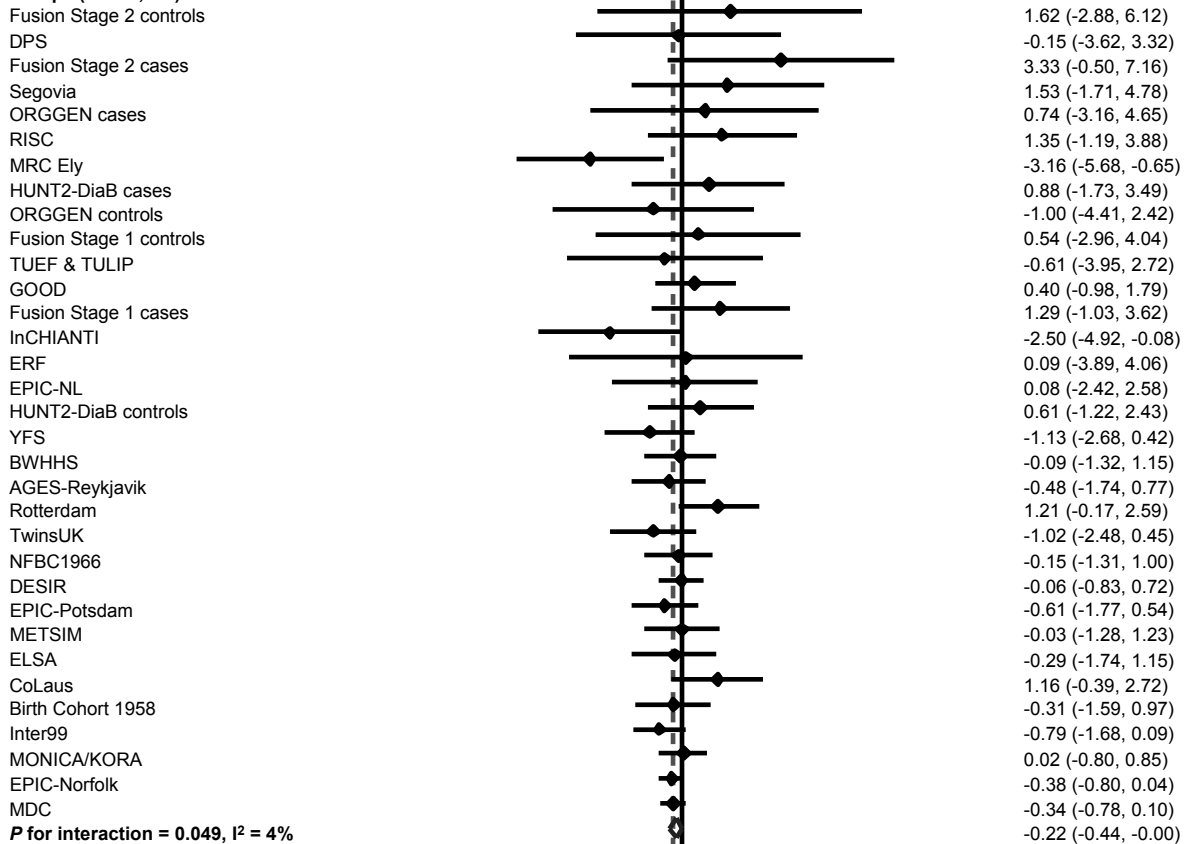

**Asia (n=5,920)**

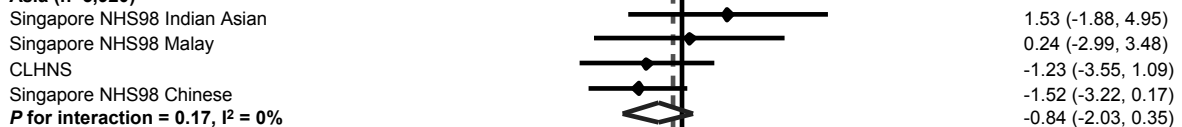

**P for interaction = 0.0018, I<sup>2</sup> = 5%**

**-0.33 (-0.54, -0.12)**

-8 -6 -4 -2 0 2 4 6 8
