# Supplementary material for: Physical Activity Attenuates the Influence of FTO Variants on Obesity Risk: A Meta-Analysis of 218,166 Adults and 19,268 Children
Source: PubMed Central journal article supplement (PMC3206047; doi:10.1371/journal.pmed.1001116), 2011-11-01

**Study**

**Interaction Z-score (95% CI)**

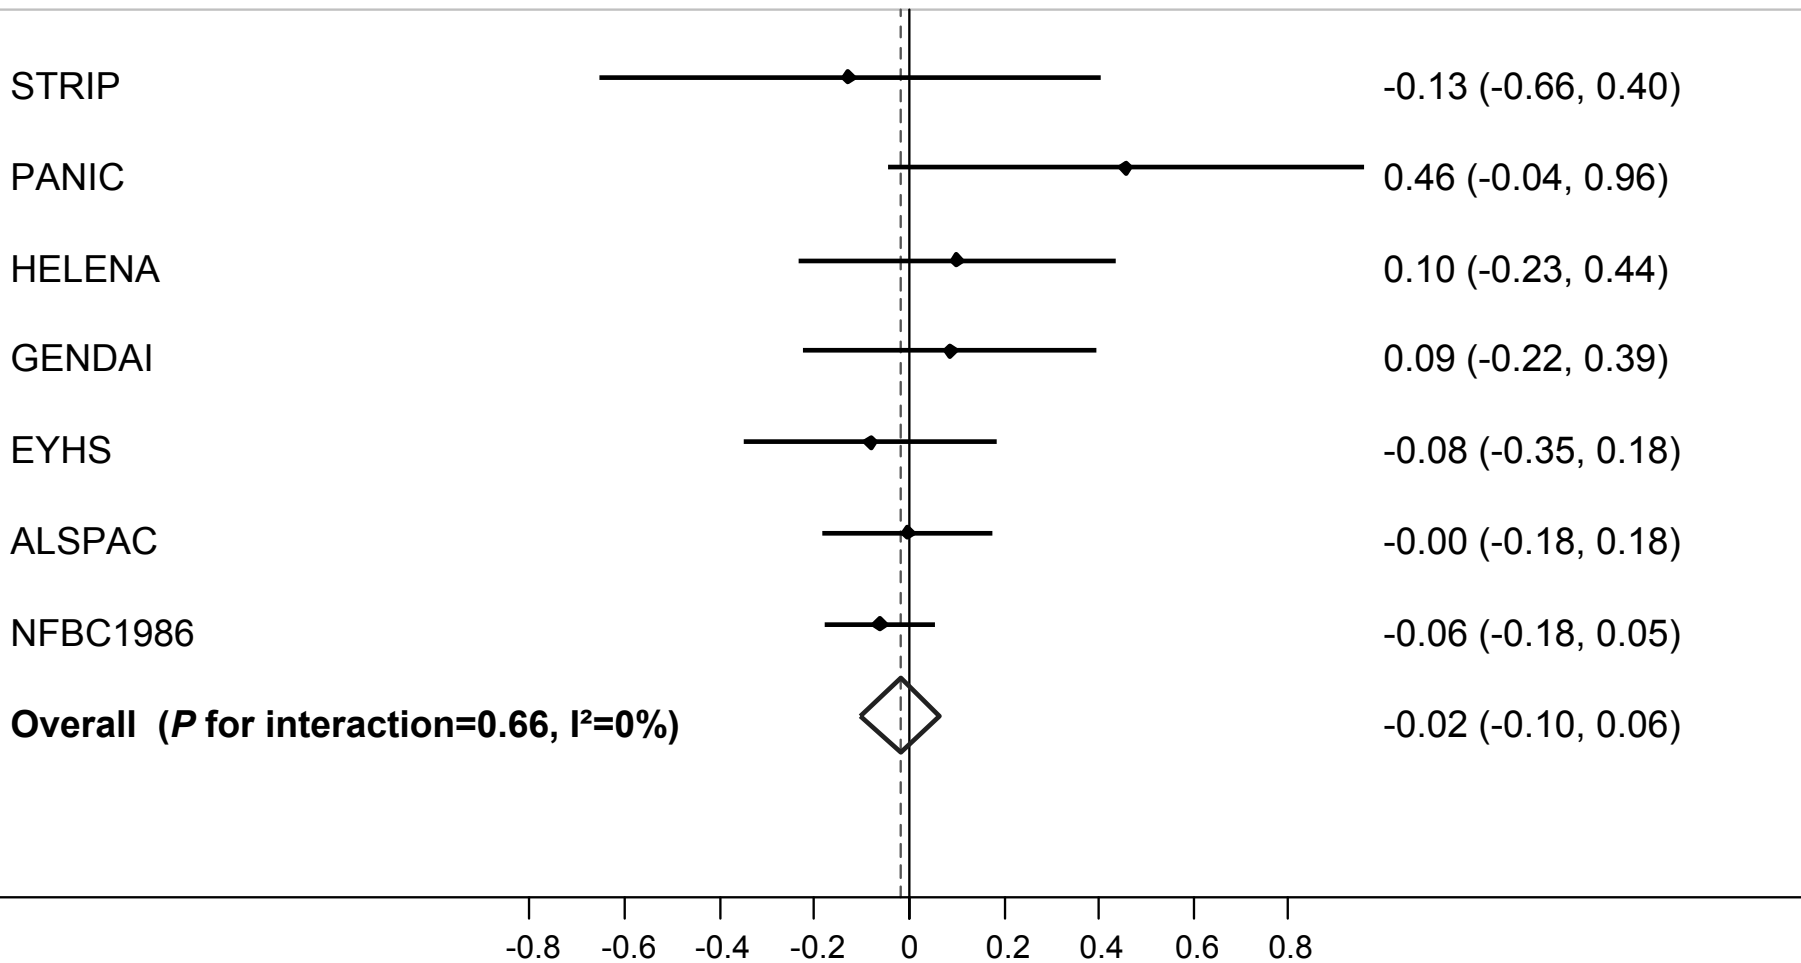

Supplement: pmed.1001116.s006.pdf [file pmed.1001116.s006.pdf]
