# Supplementary material for: Physical Activity Attenuates the Influence of FTO Variants on Obesity Risk: A Meta-Analysis of 218,166 Adults and 19,268 Children
Source: PubMed Central journal article supplement (PMC3206047; doi:10.1371/journal.pmed.1001116), 2011-11-01
Supplement: pmed.1001116.s007.pdf [file pmed.1001116.s007.pdf]

**Study**

**Interaction Z-score (95% CI)**

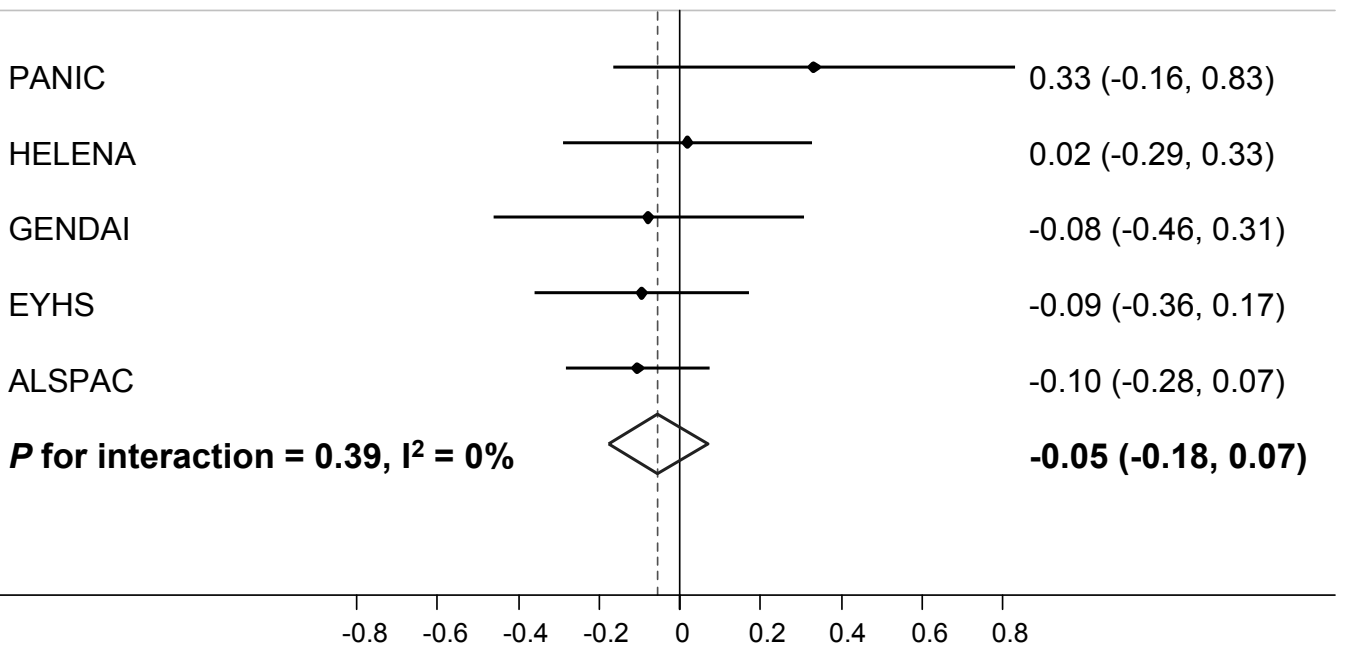

**P for interaction = 0.39, I<sup>2</sup> = 0%**

**-0.05 (-0.18, 0.07)**
