# Supplementary material for: Physical Activity Attenuates the Influence of FTO Variants on Obesity Risk: A Meta-Analysis of 218,166 Adults and 19,268 Children
Source: PubMed Central journal article supplement (PMC3206047; doi:10.1371/journal.pmed.1001116), 2011-11-01
Supplement: pmed.1001116.s010.pdf [file pmed.1001116.s010.pdf]

**Table S1.** Association of physical activity with BMI, waist circumference, body fat percentage, risk of obesity, and risk of overweight in a random effects meta-analysis of up to 218,166 adults.

| Trait                                                        | Meta-analysis   | N       | beta (95% CI)        | P                     | I <sup>2</sup> |
|--------------------------------------------------------------|-----------------|---------|----------------------|-----------------------|----------------|
| BMI (kg/m <sup>2</sup> )                                     | All individuals | 218,166 | -0.79 (-0.99, -0.60) | 2.7×10 <sup>-15</sup> | 94%            |
|                                                              | Europe          | 164,307 | -0.72 (-0.89, -0.55) | 4.3×10 <sup>-16</sup> | 91%            |
|                                                              | North America   | 47,938  | -1.34 (-1.83, -0.84) | 9.5×10 <sup>-8</sup>  | 92%            |
|                                                              | Asia            | 5,921   | 0.74 (0.06-1.43)     | 0.034                 | 79%            |
| Waist circumference (cm)                                     | All individuals | 159,848 | -2.44 (-2.95, -1.93) | 1.1×10 <sup>-20</sup> | 92%            |
|                                                              | Europe          | 128,811 | -2.55 (-3.11, -1.98) | 1.1×10 <sup>-18</sup> | 92%            |
|                                                              | North America   | 25,117  | -3.19 (-4.34, -2.04) | 5.1×10 <sup>-8</sup>  | 84%            |
|                                                              | Asia            | 5,920   | 1.13 (-0.22, 2.49)   | 0.10                  | 70%            |
| Body fat percentage (%)                                      | All individuals | 61,509  | -1.30 (-1.62, -0.98) | 1.1×10 <sup>-15</sup> | 77%            |
|                                                              | Europe          | 60,617  | -1.33 (-1.66, -1.00) | 2.1×10 <sup>-15</sup> | 80%            |
|                                                              | North America   | 892     | -0.70 (-1.98, 0.57)  | 0.279                 | 0%             |
|                                                              | Asia            | NA      | NA                   | NA                    | NA             |
| Risk of obesity<br>(BMI≥30 vs. BMI<25 kg/m <sup>2</sup> )    | All individuals | 131,474 | 0.67 (0.60, 0.75)    | 2.2×10 <sup>-13</sup> | 90%            |
|                                                              | Europe          | 97,877  | 0.66 (0.58, 0.74)    | 1.1×10 <sup>-12</sup> | 88%            |
|                                                              | North America   | 29,282  | 0.58 (0.46, 0.72)    | 1.3×10 <sup>-6</sup>  | 86%            |
|                                                              | Asia            | 4,315   | 1.66 (1.04, 2.66)    | 0.035                 | 54%            |
| Risk of overweight<br>(BMI≥25 vs. BMI<25 kg/m <sup>2</sup> ) | All individuals | 213,564 | 0.81 (0.76, 0.87)    | 6.9×10 <sup>-9</sup>  | 86%            |
|                                                              | Europe          | 163,069 | 0.81 (0.76, 0.87)    | 3.2×10 <sup>-9</sup>  | 82%            |
|                                                              | North America   | 44,574  | 0.70 (0.60, 0.83)    | 1.6×10 <sup>-5</sup>  | 82%            |
|                                                              | Asia            | 5,921   | 1.23 (0.83, 1.81)    | 0.300                 | 82%            |

All models are adjusted for age and sex. beta, difference in trait in physically active individuals compared to inactive individuals;

I<sup>2</sup>, heterogeneity between studies in the association of physical activity with the trait; OR, odds ratio in physically active individuals compared with inactive individuals
