# Supplementary material for: Physical Activity Attenuates the Influence of FTO Variants on Obesity Risk: A Meta-Analysis of 218,166 Adults and 19,268 Children
Source: PubMed Central journal article supplement (PMC3206047; doi:10.1371/journal.pmed.1001116), 2011-11-01
Supplement: pmed.1001116.s012.pdf [file pmed.1001116.s012.pdf]

**Table S3.** Association of the minor (A) allele of the rs9939609 SNP in *FTO* with age- and sex-standardised BMI, waist circumference, and body fat percentage in a random effects meta-analysis of up to 19,268 children and adolescents.

| Trait                       | All children |                   |                       |                | Inactive children |                   |        |                | Physically active children |                   |                       |                |
|-----------------------------|--------------|-------------------|-----------------------|----------------|-------------------|-------------------|--------|----------------|----------------------------|-------------------|-----------------------|----------------|
|                             | N            | beta (95% CI)     | P                     | I <sup>2</sup> | N                 | beta (95% CI)     | P      | I <sup>2</sup> | N                          | beta (95% CI)     | P                     | I <sup>2</sup> |
| BMI Z-score                 | 19,268       | 0.10 (0.08, 0.12) | 1.3x10 <sup>-21</sup> | 0%             | 2,594             | 0.09 (0.03, 0.15) | 0.0045 | 0%             | 16,674                     | 0.10 (0.08, 0.12) | 1.3x10 <sup>-18</sup> | 0%             |
| Waist circumference Z-score | 8,638        | 0.11 (0.08, 0.13) | 8.0x10 <sup>-16</sup> | 0%             | 1,067             | 0.12 (0.03, 0.20) | 0.0070 | 0%             | 7,571                      | 0.10 (0.08, 0.13) | 9.6x10 <sup>-13</sup> | 0%             |
| Body fat percentage Z-score | 3,158        | 0.12 (0.09, 0.16) | 1.8x10 <sup>-11</sup> | 0%             | 306               | 0.17 (0.05, 0.30) | 0.0059 | 0%             | 2,852                      | 0.12 (0.06, 0.15) | 6.6x10 <sup>-10</sup> | 0%             |

All models are adjusted for age and sex.

beta, difference in trait per minor allele of rs9939609 or a proxy ( $r^2 > 0.8$ ); I<sup>2</sup>, heterogeneity between studies in the association of rs9939609 with the trait
