# Supplementary material for: Physical Activity Attenuates the Influence of FTO Variants on Obesity Risk: A Meta-Analysis of 218,166 Adults and 19,268 Children
Source: PubMed Central journal article supplement (PMC3206047; doi:10.1371/journal.pmed.1001116), 2011-11-01
Supplement: pmed.1001116.s013.pdf [file pmed.1001116.s013.pdf]

**Table S4.** Results of meta-regression showing the associations of all study characteristics combined with the *FTO*×PA interaction effect on BMI in adults.

| Study characteristic                                                                           | Effect * | P     |
|------------------------------------------------------------------------------------------------|----------|-------|
| Sample size                                                                                    | +        | 0.41  |
| Proportion of inactive individuals, %                                                          | +        | 0.56  |
| Mean BMI, kg/m <sup>2</sup>                                                                    | -        | 0.99  |
| Gender<br><i>Male (0) vs. female (1)</i>                                                       | +        | 0.44  |
| Age group<br><i>&lt;60 yrs (0) vs. ≥60 yrs (1)</i>                                             | -        | 0.93  |
| Study design<br><i>population- or family-based (0), vs. case-control (1)</i>                   | -        | 0.63  |
| Ethnicity<br><i>White (0) vs. African American (1)</i>                                         | +        | 0.51  |
| Ethnicity<br><i>White (0) vs. Asian (1)</i>                                                    | -        | 0.87  |
| Ethnicity<br><i>White (0) vs. Hispanic (1)</i>                                                 | -        | 0.30  |
| Geographic region<br><i>Europe (0) vs. North America (1)</i>                                   | +        | 0.001 |
| Geographic region<br><i>Europe (0) vs. Asia (1)</i>                                            | +        | 0.75  |
| Measurement of PA<br><i>PA variable categorical (0) vs. continuous (1)</i>                     | +        | 0.77  |
| Measurement of PA,<br><i>Leisure-time PA only (0) vs. leisure-time and occupational PA (1)</i> | +        | 0.22  |
| Measurement of PA,<br><i>Questionnaire-based (0) vs. objective (1)</i>                         | +        | 0.77  |

The results are for a meta-regression model where all the listed covariates were entered into the model simultaneously. Ethnicity and geographic region were entered into the model as indicator ('dummy') variables.

\* Effect (+) indicates that an increase in the covariate value resulted as a stronger interaction between rs9939609 and PA (i.e. physically active individuals had a stronger attenuation in the association of rs9939609 risk allele with BMI), whereas effect (-) indicates the opposite.
