# Supplementary material for: Physical Activity Attenuates the Influence of FTO Variants on Obesity Risk: A Meta-Analysis of 218,166 Adults and 19,268 Children
Source: PLoS Med. 2011 Nov 1;8(11):e1001116. doi: 10.1371/journal.pmed.1001116 (PMC3206047; doi:10.1371/journal.pmed.1001116)
Supplement: Table S2 — Association of physical activity with age- and sex-standardized BMI, waist circumference, and body fat percentage in a random effects meta-analysis of up to 19,268 children and adolescents. (PDF) [file pmed.1001116.s011.pdf]

**Table S2.** Association of physical activity with age- and sex-standardised BMI, waist circumference, and body fat percentage in a random effects meta-analysis of up to 19,268 children and adolescents.

| Trait                       | N      | beta (95% CI)        | P     | I <sup>2</sup> |
|-----------------------------|--------|----------------------|-------|----------------|
| BMI Z-score                 | 19,268 | -0.04 (-0.10, 0.02)  | 0.15  | 39%            |
| Waist circumference Z-score | 12,392 | -0.11 (-0.21, -0.00) | 0.044 | 60%            |
| Body fat percentage Z-score | 6,864  | -0.21 (-0.38, -0.04) | 0.015 | 72%            |

Beta, difference in trait in physically active children compared to inactive children; I<sup>2</sup>, heterogeneity between studies in the association of physical activity with the trait
