# Supplementary material for: Physical Activity Attenuates the Influence of FTO Variants on Obesity Risk: A Meta-Analysis of 218,166 Adults and 19,268 Children
Source: PLoS Med. 2011 Nov 1;8(11):e1001116. doi: 10.1371/journal.pmed.1001116 (PMC3206047; doi:10.1371/journal.pmed.1001116)
Supplement: Table S5 — Results of meta-regressions for the association of each study characteristic separately with the FTO×PA interaction effect on BMI in adults. (PDF) [file pmed.1001116.s014.pdf]

**Table S5.** Results of meta-regressions for the association of each study characteristic separately with the *FTO*xPA interaction effect on BMI in adults.

| Study characteristic                                                                           | Effect * | P                    |
|------------------------------------------------------------------------------------------------|----------|----------------------|
| Sample size                                                                                    | +        | 0.17                 |
| Proportion of inactive individuals, %                                                          | -        | 0.46                 |
| Mean BMI, kg/m <sup>2</sup>                                                                    | +        | 0.64                 |
| Gender<br><i>Male (0) vs. female (1)</i>                                                       | +        | 0.32                 |
| Age group<br><i>&lt;60 yrs (0) vs. ≥60 yrs (1)</i>                                             | -        | 0.46                 |
| Study design<br><i>population- or family-based (0), vs. case-control (1)</i>                   | -        | 0.80                 |
| Ethnicity<br><i>White (0) vs. African American (1)</i>                                         | +        | 0.21                 |
| Ethnicity<br><i>White (0) vs. Asian (1)</i>                                                    | +        | 0.58                 |
| Ethnicity<br><i>White (0) vs. Hispanic (1)</i>                                                 | -        | 0.50                 |
| Geographic region<br><i>Europe (0) vs. North America (1)</i>                                   | +        | 3.3x10 <sup>-6</sup> |
| Geographic region<br><i>Europe (0) vs. Asia (1)</i>                                            | +        | 0.43                 |
| Measurement of PA<br><i>PA variable categorical (0) vs. continuous (1)</i>                     | +        | 0.10                 |
| Measurement of PA,<br><i>Leisure-time PA only (0) vs. leisure-time and occupational PA (1)</i> | +        | 0.87                 |
| Measurement of PA,<br><i>Questionnaire-based (0) vs. objective (1)</i>                         | +        | 0.41                 |

The results are for metaregressions where each covariate was studied separately without adjustment for the other covariates. Ethnicity and geographic region were entered into the model as indicator ('dummy') variables.

\* Effect (+) indicates that an increase in the covariate value resulted as a stronger interaction between rs9939609 and PA (i.e. physically active individuals had a stronger attenuation in the association of rs9939609 risk allele with BMI), whereas effect (-) indicates the opposite.
